# Supplementary material for: Construction of High-Density Genetic Map and Mapping Quantitative Trait Loci for Growth Habit-Related Traits of Peanut (Arachis hypogaea L.)
Source: PubMed Central journal article supplement (PMC6584813; doi:10.3389/fpls.2019.00745), 2019-06-12

Supplementary Figure S2. Boxplot showing the distribution of the means variations for five traits among the RILs in seven environments.

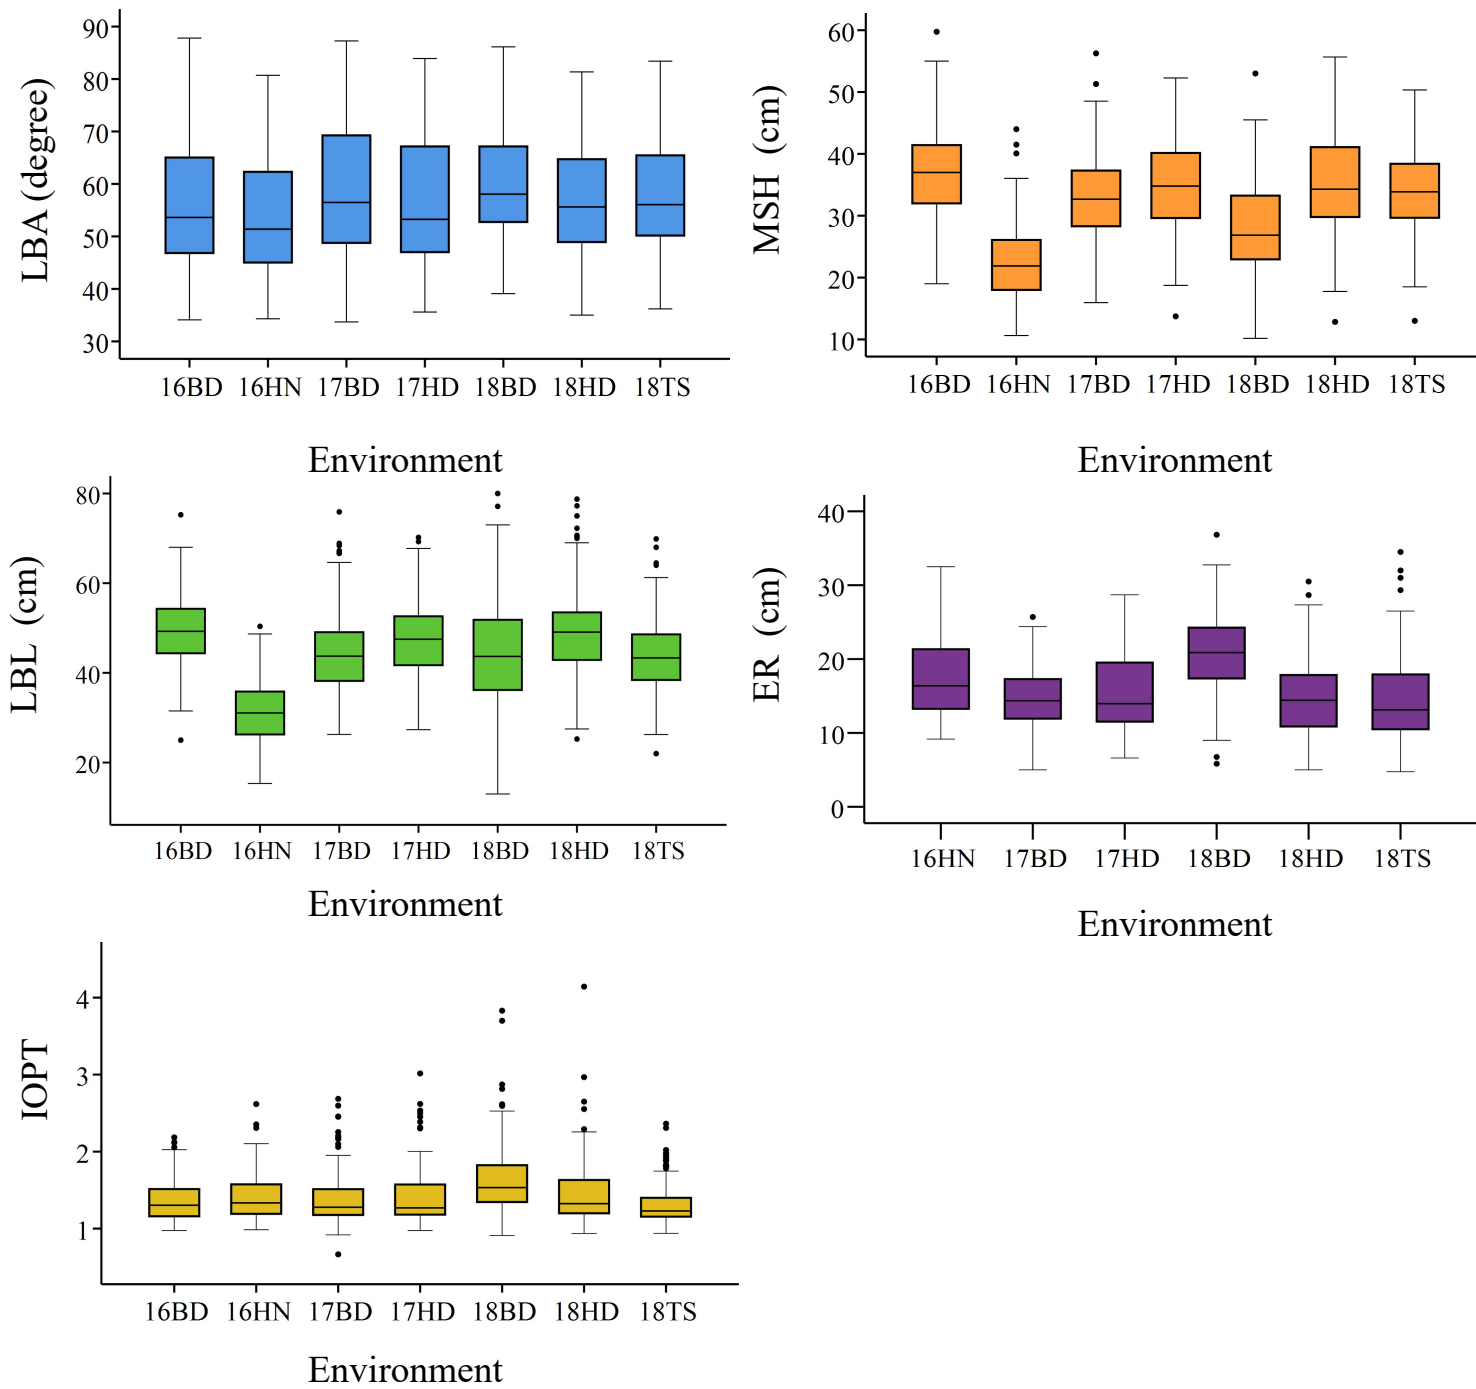

Supplement: Image_2.pdf [file Image_2.pdf]
