# Supplementary material for: Construction of High-Density Genetic Map and Mapping Quantitative Trait Loci for Growth Habit-Related Traits of Peanut (Arachis hypogaea L.)
Source: PubMed Central journal article supplement (PMC6584813; doi:10.3389/fpls.2019.00745), 2019-06-12

Supplementary Figure S5. The correlation of the genetic and physical positions. Axis of abscissa represents the genetic linkage groups and axis of ordinate represents the physical positions.

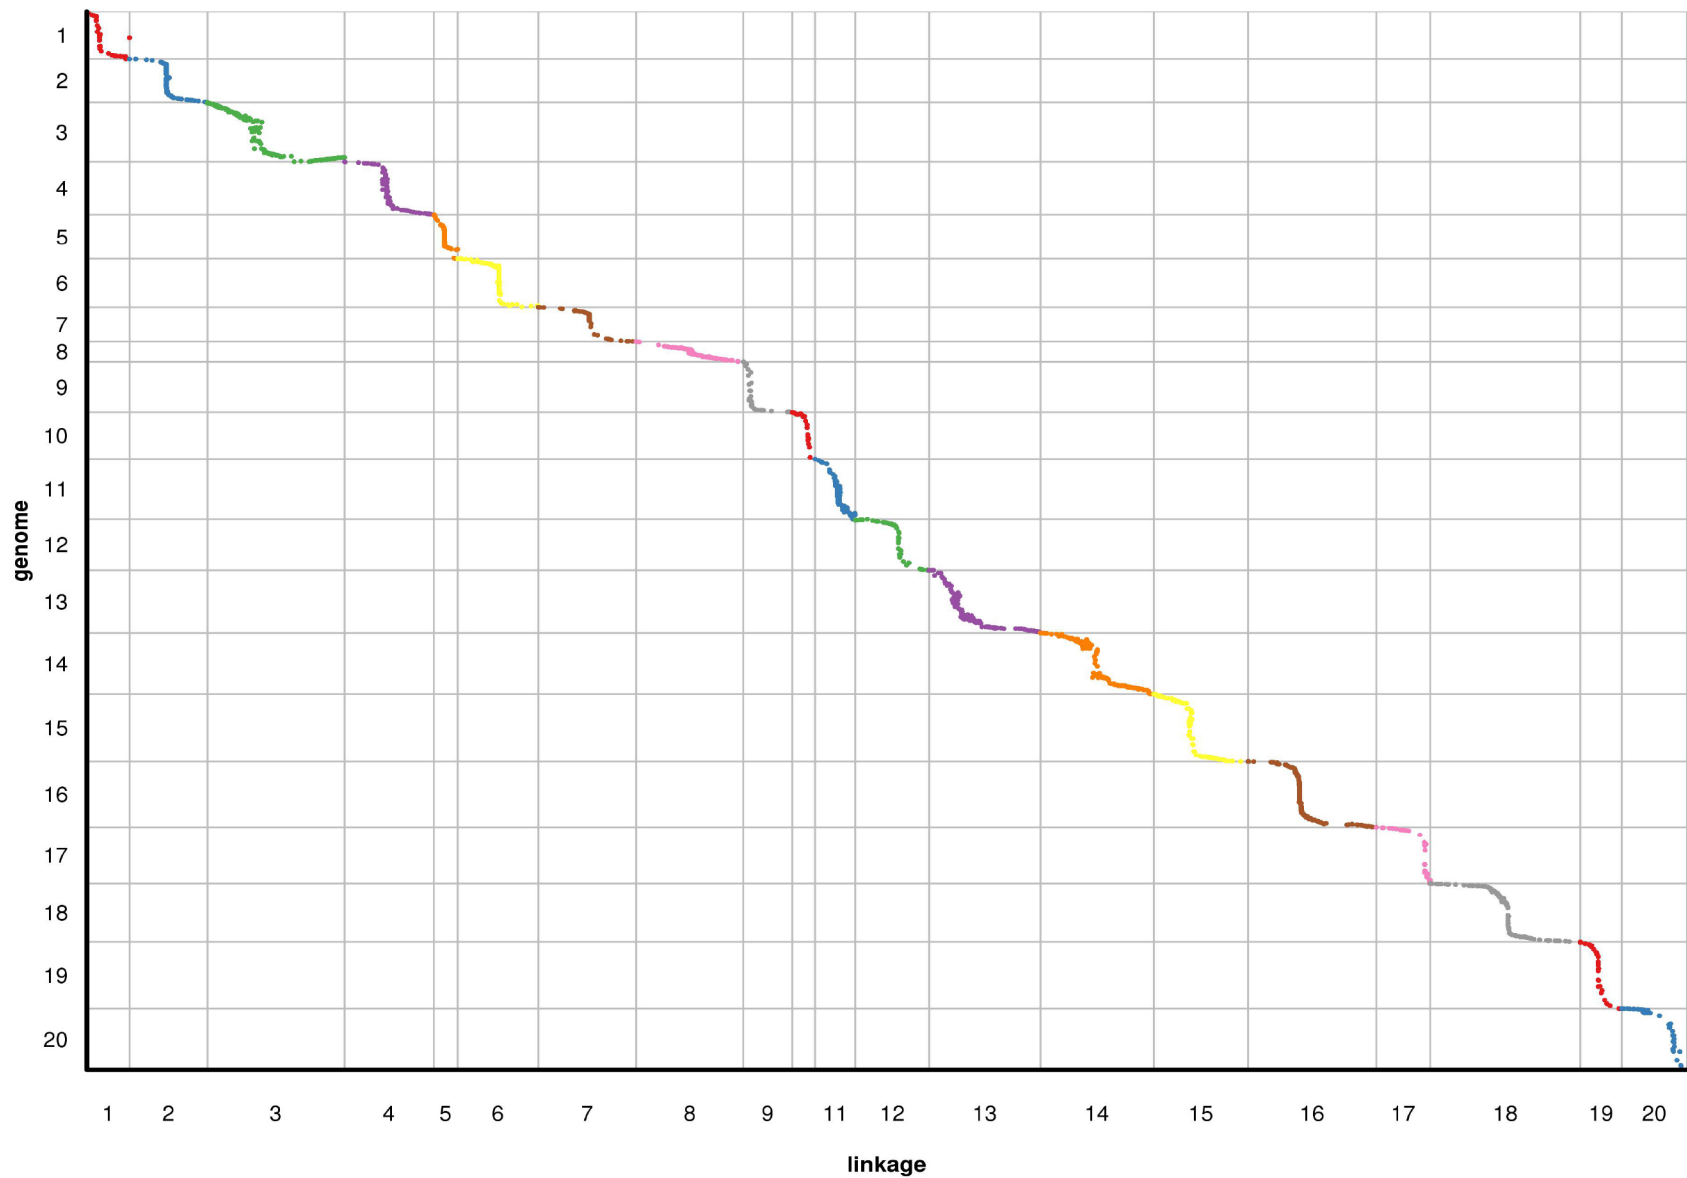

Supplement: Image_5.pdf [file Image_5.pdf]
